# Supplementary material for: Ru(iii)-based compounds with sulfur donor ligands: synthesis, characterization, electrochemical behaviour and anticancer activity
Source: Royal Society of Chemistry journal article supplement (doi:10.1039/b806341a), 2008-01-01
Supplement: b806341a.pdf [file b806341a.pdf]

**Ru(III)-Based Compounds with Sulfur Donor Ligands: synthesis, characterization,  
electrochemical behavior and anticancer activity.**

Lorena Giovagnini,<sup>a</sup> Sergio Sitran,<sup>b</sup> Ignazio Castagliuolo,<sup>c</sup> Paola Brun,<sup>c</sup> Maddalena Corsini,<sup>d</sup> Piero Zanello,<sup>d</sup> Alfonso Zoleo,<sup>a</sup> Annalisa Maniero,<sup>a</sup> Barbara Biondi<sup>a</sup> and Dolores Fregona\*<sup>a</sup>

[a] Prof. D. Fregona, A. Maniero, Dr. L. Giovagnini,  
A. Zoleo and Dr. B. Biondi  
Department of Chemical Sciences  
University of Padova  
Via Marzolo 1, 35131 Padova, Italy.  
Fax: +39-02-700500560  
Tel: +39-049-8275159  
E-mail: [dolores.fregona@unipd.it](mailto:dolores.fregona@unipd.it)

[b] Dr. S. Sitran  
Institute of Inorganic and Surfaces Chemistry  
C.N.R. Research Area  
Corso Stati Uniti 4, 35127 Padova, Italy.

[c] Prof. I. Castagliuolo and Dr. P. Brun  
Department of Histology, Microbiology  
and Medical Biotechnology  
University of Padova  
Section of Microbiology and Virology  
Via Gabelli 63, 35131 Padova, Italy.

[d] Prof. P. Zanello and Dr. M. Corsini  
Department of Chemistry  
University of Siena  
Via A. Moro, 53100 Siena, Italy.

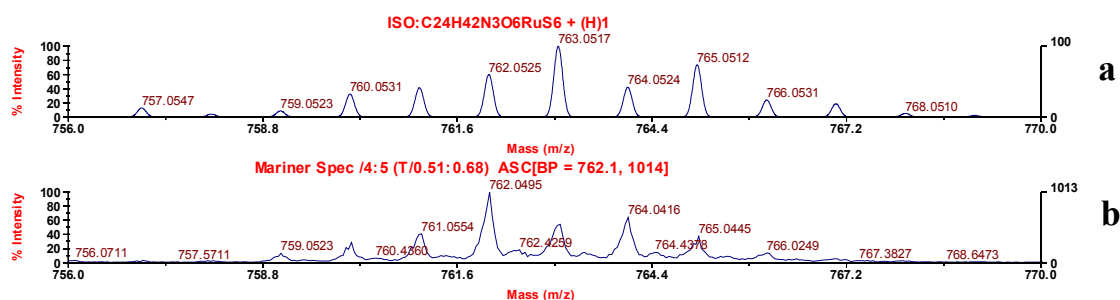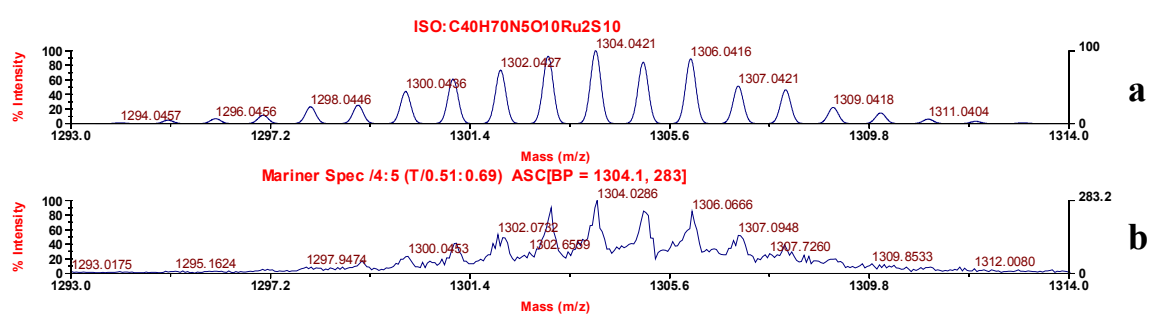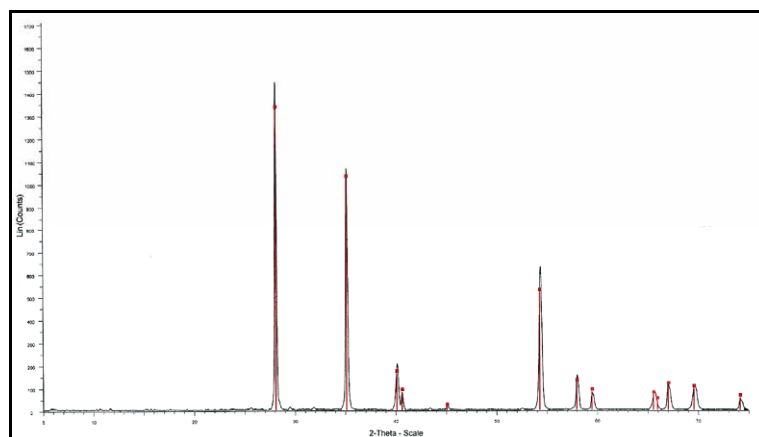

Figure S3: XRD spectrum of the final product after thermal degradation in air of the residual powder of  $[\text{Ru}(\text{ESDT})_3]$  (-) and  $\text{RuO}_2$  (-, data base).

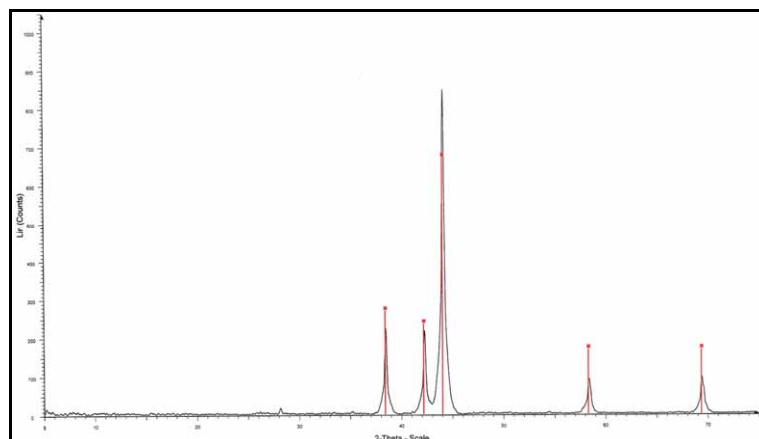

Figure S4: XRD spectrum of the final product after thermal degradation in nitrogen of the residual powder of  $[\text{Ru}(\text{ESDT})_3]$  (-) and Ru (-, data base).

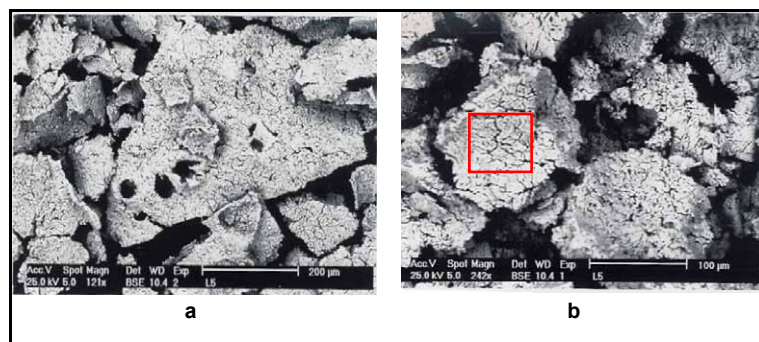

Figure S5: SEM images of the final product after thermal degradation in air of  $[\text{Ru}(\text{ESDT})_3]$  (121x (a) and 242x (b)).

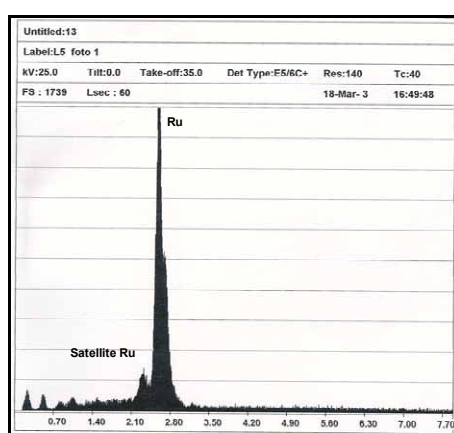

Figure S6: SEM spectrum of the red portion (see above).

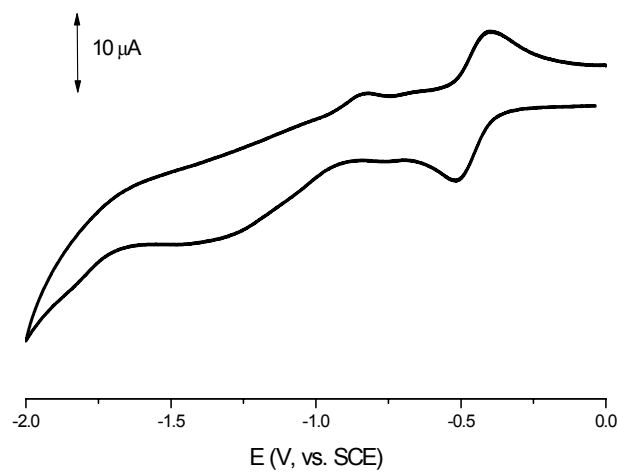

Figure S7: Cyclic voltammetric response recorded at a platinum electrode in CH<sub>2</sub>Cl<sub>2</sub> solution of [Ru<sub>2</sub>(TSDT)<sub>5</sub>]Cl (1.0x10<sup>-3</sup> mol·dm<sup>-3</sup>). [NBu<sub>4</sub>][PF<sub>6</sub>] (0.2 mol·dm<sup>-3</sup>) supporting electrolyte. Scan rate 0.2 V s<sup>-1</sup>.
